# Supplementary material for: Adjustable 1D ferroelectricity and ferrielectricity in faceted GeSe nanotubes
Source: Royal Society of Chemistry journal article supplement (doi:10.1039/d4tc00631c), 2024-01-01
Supplement: d4tc00631c1.pdf [file d4tc00631c1.pdf]

# Supplementary Information for

## Adjustable 1D ferroelectricity and ferrielectricity in faceted GeSe nanotubes

Shixin Song, Churen Gui, Shuai Dong, Dan Liu,\* and Jie Guan\*

*Key Laboratory of Quantum Materials and Devices of Ministry of Education, School of  
Physics, Southeast University, Nanjing, 211189, China*

E-mail: liudan2@seu.edu.cn; guanjie@seu.edu.cn

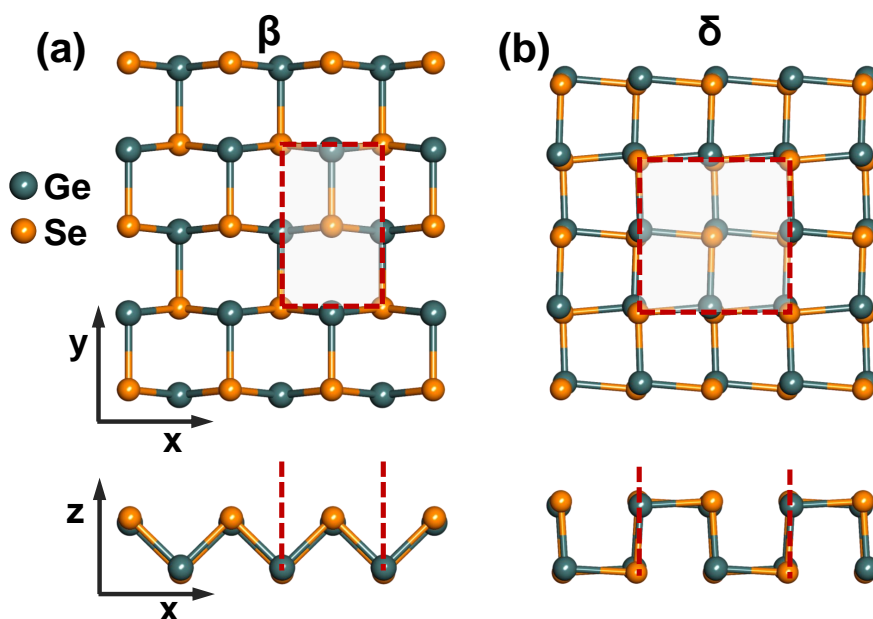

Figure S1: Equilibrium Structures of (a)  $\beta$ - and (b)  $\delta$ -GeSe monolayers in both top and side views. The unit cells are indicated by red dashed lines.

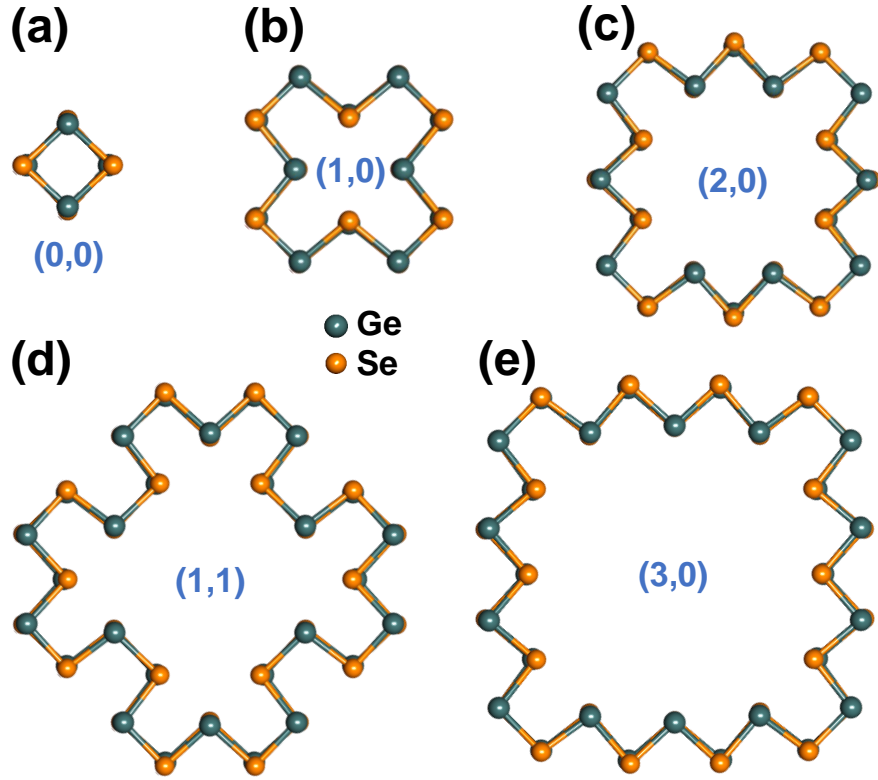

Figure S2: Equilibrium Structures of (a) (0,0)- (b) (1,0)-, (c) (2,0)-, (d) (1,1)-, and (e) (3,0)-GNTs in top view.

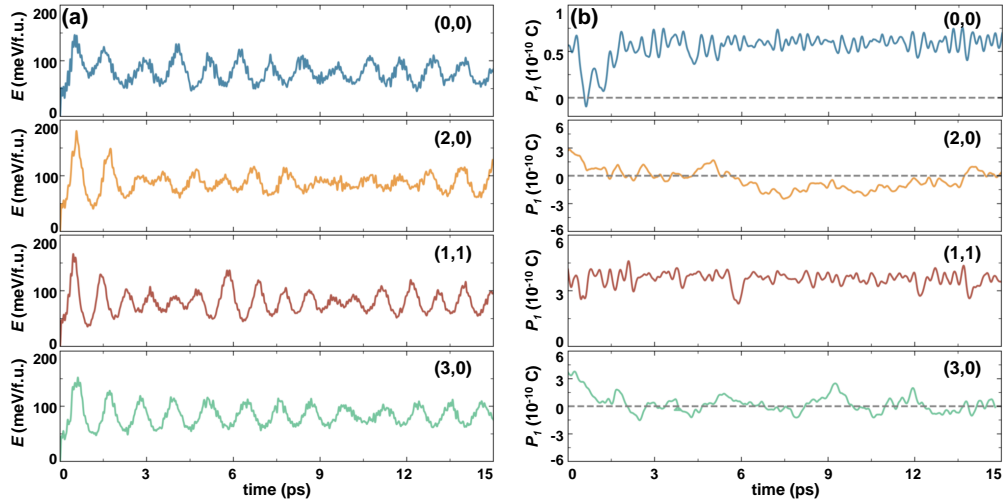

Figure S3: Fluctuations of the (a) total potential energy and (b) linear polarization ( $P_1$ ) at 300 K for (0,0)-, (2,0)-, (1,1)-, and (3,0)-GNTs.

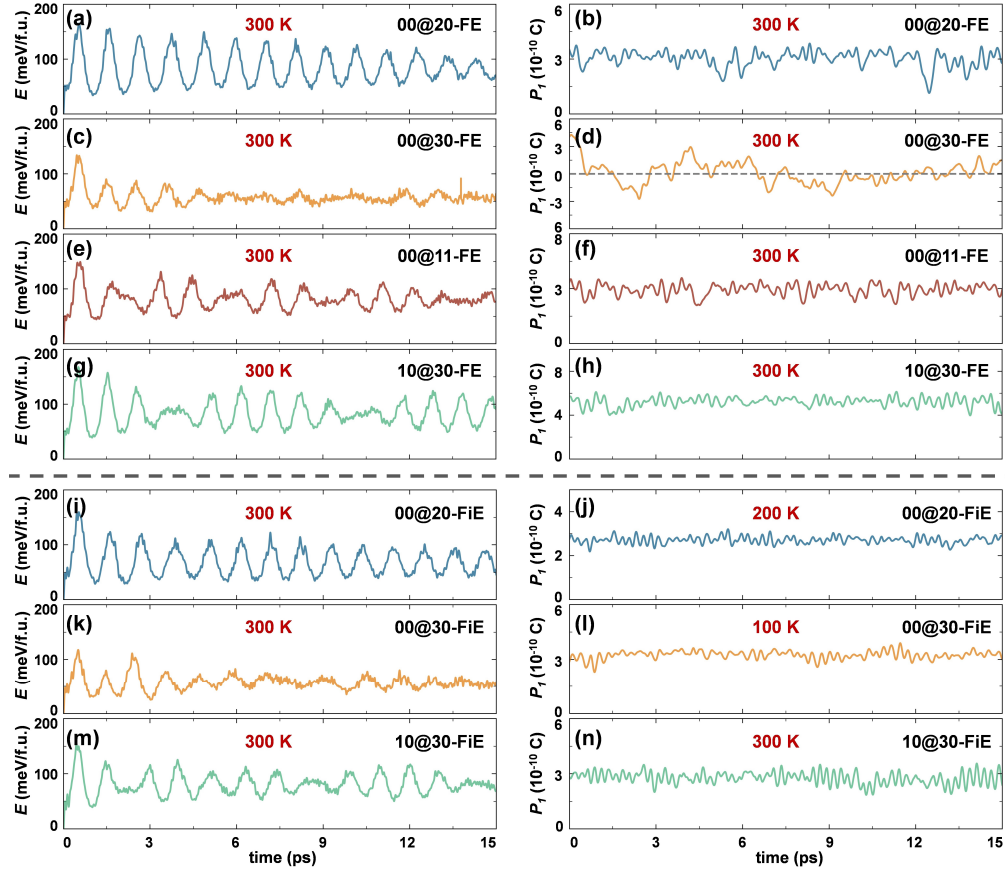

Figure S4: Fluctuations of the (a) total potential energy and (b) linear polarization ( $P_1$ ) for the FE- and FiE-stacking (0,0)@(2,0)-, (0,0)@(3,0)-, (0,0)@(1,1)-, and (1,0)@(3,0)-GNTs at selected temperatures.

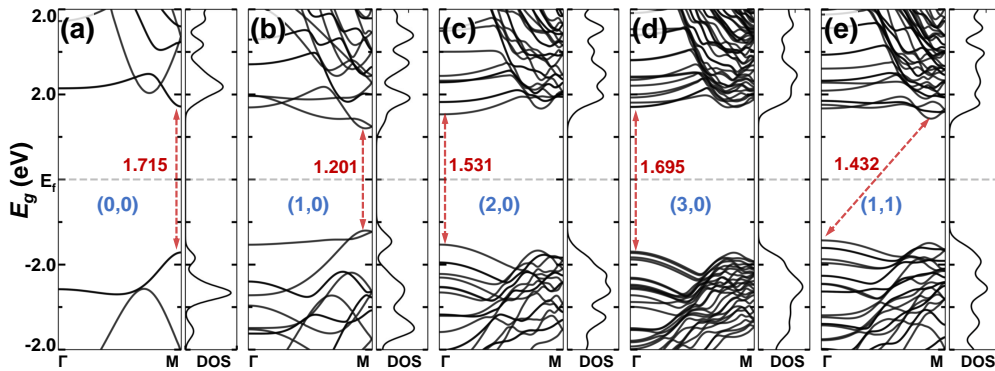

Figure S5: Electronic band structure and density of states (DOS) based on DFT-PBE for (a) (0,0)-, (b) (1,0)-, (c) (2,0)-, (d) (3,0)-, and (e) (1,1)-GNTs. The band gaps are indicated by dashed arrows and the corresponding values are given in the unit of eV.

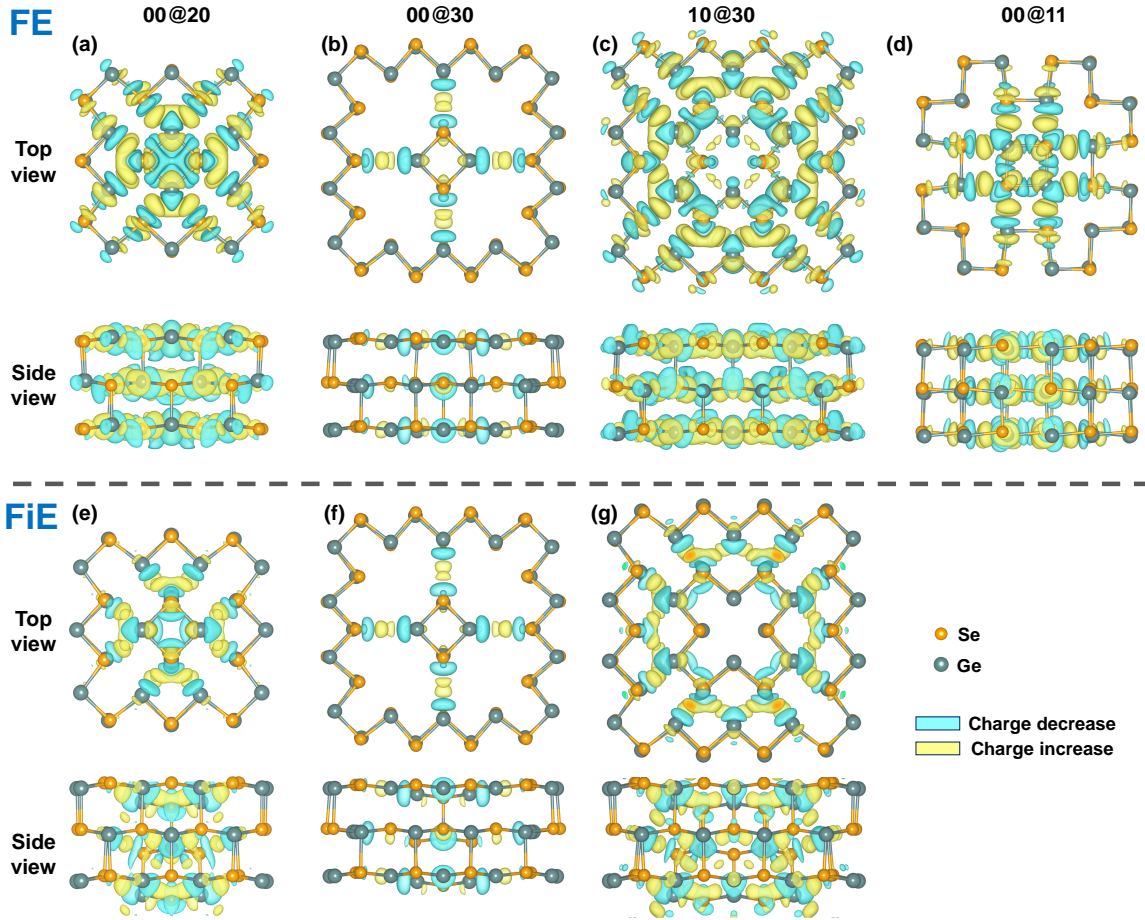

Figure S6: Differential charge density distribution for combining the DW FE-stacking (a)  $(0,0)@(2,0)-$ , (b)  $(0,0)@(3,0)-$ , (c)  $(1,0)@(3,0)-$ , (d)  $(0,0)@(1,1)-$ GNTs and FiE-stacking (e)  $(0,0)@(2,0)-$ , (f)  $(0,0)@(3,0)-$ , (g)  $(1,0)@(3,0)-$ GNTs. The yellow and blue isosurfaces represent the electron excess and deficit. The isosurface value for  $(0,0)@(3,0)-$ GNT is  $0.0002 e/\text{Bohr}^3$  and that for the others is  $0.001 e/\text{Bohr}^3$ .
